# Supplementary material for: Aerobic granular sludge-derived activated carbon: mineral acid modification and superior dye adsorption capacity
Source: Royal Society of Chemistry journal article supplement (doi:10.1039/c4ra15216f), 2015-01-01
Supplement: c4ra15216f1.pdf [file c4ra15216f1.pdf]

### Supplementary Information

for

### Aerobic granular sludge-derived activated carbon: mineral acid modification and superior dye adsorption capacity

Ge Zhang<sup>a</sup>, Li Shi<sup>b</sup>, Yongfang Zhang<sup>a</sup>, Dong Wei<sup>\*b</sup>, Tao Yan<sup>a</sup>, Qin Wei<sup>b</sup>,  
and Bin Du<sup>\*a</sup>

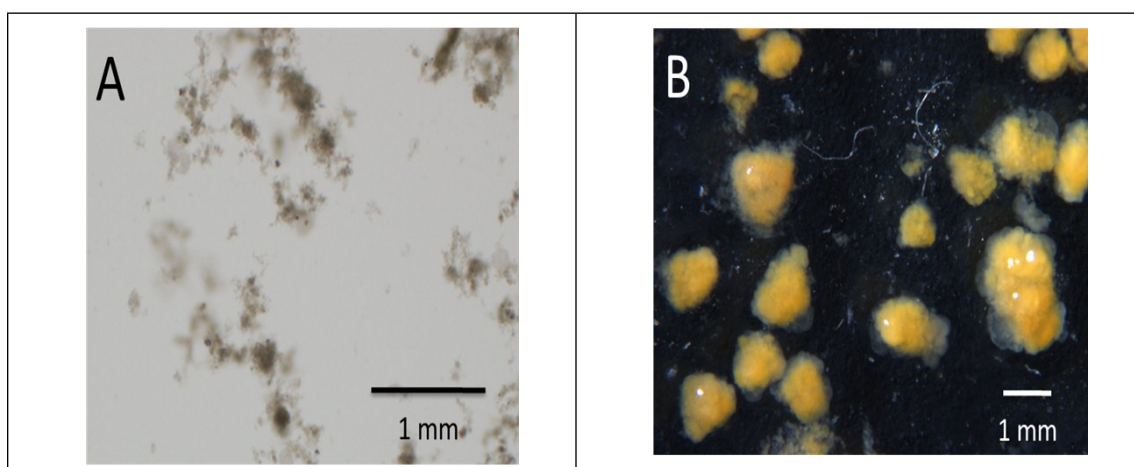

**Fig.S1** Microscopic observation of activated sludge (A) and aerobic granular sludge (B)

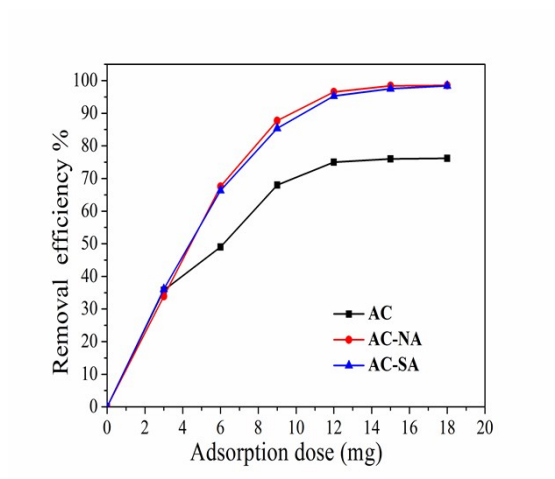

**Fig.S2** Effect of adsorbent dose on the adsorption of MG by activated carbons

**Table S1.** Parameters of pseudo-first-order and pseudo-second-order models

| samples | $q_{e,exp}$<br>(mg/g) | Pseudo-first-order         |                    |        | Pseudo-second-order        |                    |        |
|---------|-----------------------|----------------------------|--------------------|--------|----------------------------|--------------------|--------|
|         |                       | $k_1$ (min <sup>-1</sup> ) | $q_{e,cal}$ (mg/g) | $R^2$  | $K_2$ (min <sup>-1</sup> ) | $q_{e,cal}$ (mg/g) | $R^2$  |
| AC      | 75.64                 | 0.0171                     | 61.07              | 0.5959 | 0.00067                    | 77.8               | 0.9967 |
| AC-NA   | 98.02                 | 0.0163                     | 38.28              | 0.9147 | 0.0014                     | 99.6               | 0.9998 |
| AC-SA   | 97.34                 | 0.0121                     | 25.27              | 0.9843 | 0.0016                     | 98.5               | 0.9997 |

**Table S2.** Parameters of intra-particle diffusion model for the adsorption of MG onto activated carbon

| samples | $k_{int1}(\text{mg}/\text{h}^{1/2}/\text{g})$ | $C_1$ | $R_1^2$ | $k_{int2}(\text{mg}/\text{h}^{1/2}/\text{g})$ | $C_2$ | $R_2^2$ | $k_{int3}(\text{mg}/\text{h}^{1/2}/\text{g})$ | $C_3$ | $R_3^2$ |
|---------|-----------------------------------------------|-------|---------|-----------------------------------------------|-------|---------|-----------------------------------------------|-------|---------|
| AC      | 10.00                                         | 0     | -       | 2.76                                          | 31.61 | 0.976   | 1.40                                          | 47.16 | 0.953   |
| AC-NA   | 18.44                                         | 0     | -       | 1.70                                          | 72.13 | 0.928   | 0.16                                          | 94.97 | 0.854   |
| AC-SA   | 19.93                                         | 0     | -       | 1.57                                          | 72.85 | 0.939   | 0.10                                          | 95.04 | 0.597   |
